# Supplementary material for: Soil Microbial Indicators within Rotations and Tillage Systems
Source: MDPI journal article supplement (doi:10.3390/microorganisms9061244), 2021-06-08
Supplement: s1 [file s1]

# Soil microbial indicators within rotations and tillage systems

**Gevan D Behnke<sup>1</sup>, Nakian Kim<sup>1</sup>, Maria C Zabaloy<sup>2</sup>, Chance Riggins<sup>1</sup>, Sandra Rodriguez-Zas<sup>3</sup> and Maria B. Villamil<sup>1\*</sup>**

<sup>1</sup>University of Illinois, Crop Sciences, Urbana, IL, USA

<sup>2</sup> Centro de Recursos Naturales Renovables de la Zona Semiárida (CERZOS, UNS-CONICET), Departamento de Agronomía, Universidad Nacional del Sur, Bahia Blanca, Argentina

<sup>3</sup>University of Illinois, Animal Sciences, Urbana, IL, USA

**\* Correspondence:**  
Villamil@illinois.edu

## Supplementary Material

**Table S1.** Summary of field practices from Monmouth, Illinois from 1997-2016; dates are ranges that vary slightly year to year.

| Field event type                             | Dates                  |
|----------------------------------------------|------------------------|
| Tilled wheat plots                           | Late Sept - early Oct  |
| Planted wheat crop                           | Late Sept - early Oct  |
| Fall wheat fertilization                     | Late Oct - early Nov   |
| Fall tillage of corn and soybean plots†      | Mid Nov                |
| Spring wheat fertilization                   | Late March - early Apr |
| Secondary tillage in corn and soybean plots‡ | Mid April - early May  |
| Spring corn fertilization                    | Mid April - mid May    |
| Corn planting                                | Mid April - mid May    |
| Soybean planting                             | Early - mid May        |
| Harvest of wheat                             | Late June - late July  |
| Harvest of corn                              | Late Sept - early Oct  |
| Harvest of soybean                           | Late Sept - early Oct  |

†Chisel tillage used a disk-ripper 14" deep in plots designated as tilled; no till received zero tillage

‡Secondary tillage used a field cultivator in plots designated as tilled; no-till received zero tillage

**Table S2.** Principal component analysis of soil variables (17) for 0-10 cm soil depth with eigenvalues and cumulative proportion of the data set variability explained by the five principal components (PC) extracted with eigenvalues >1. Component correlation scores (eigenvectors) with loadings greater than |0.5| are bolded. Probability values for the analysis of variance (ANOVA) and degrees of freedom (df) available for the effects of rotation|phase (Rotation), tillage (Tillage), and their interaction are shown for each extracted PCs.

|                              |           | <b>PC1</b>                          | <b>PC2</b>    | <b>PC3</b>       | <b>PC4</b>    | <b>PC5</b>    |
|------------------------------|-----------|-------------------------------------|---------------|------------------|---------------|---------------|
| <b>Eigenvalue</b>            |           | 4.8                                 | 4.07          | 1.87             | 1.32          | 1.2           |
| <b>Cum. Proportion</b>       |           | 0.28                                | 0.52          | 0.63             | 0.71          | 0.78          |
| <b>Soil variable</b>         |           | <b>Component Correlation Scores</b> |               |                  |               |               |
| pH                           |           | <b>0.76</b>                         | <b>-0.6</b>   | -0.06            | 0.02          | 0.09          |
| CEC                          |           | -0.11                               | <b>0.95</b>   | -0.04            | -0.08         | -0.11         |
| SOM                          |           | -0.23                               | <b>0.59</b>   | <b>-0.61</b>     | -0.01         | 0.21          |
| NO <sub>3</sub> <sup>-</sup> |           | 0.27                                | 0.16          | <b>0.66</b>      | -0.4          | -0.17         |
| NH <sub>4</sub> <sup>+</sup> |           | -0.38                               | 0.15          | -0.26            | <b>0.65</b>   | 0.08          |
| P                            |           | 0.31                                | 0.41          | 0.25             | 0.39          | 0.35          |
| S                            |           | -0.32                               | 0.12          | 0.13             | <b>-0.55</b>  | <b>0.55</b>   |
| K                            |           | <b>-0.55</b>                        | 0.25          | 0.34             | 0.04          | 0.23          |
| Na                           |           | <b>0.55</b>                         | <b>0.71</b>   | -0.14            | -0.07         | -0.16         |
| Ca                           |           | <b>0.87</b>                         | 0.35          | -0.06            | 0.12          | -0.14         |
| Mg                           |           | -0.05                               | 0.28          | 0.39             | 0.1           | <b>-0.58</b>  |
| Al                           |           | <b>-0.74</b>                        | 0.08          | <b>0.49</b>      | 0.29          | -0.06         |
| Fe                           |           | <b>-0.49</b>                        | <b>0.77</b>   | 0.2              | 0.1           | 0.01          |
| B                            |           | <b>0.7</b>                          | 0.09          | 0.28             | 0.15          | 0.33          |
| Zn                           |           | 0.44                                | <b>0.71</b>   | 0.18             | -0.06         | 0.29          |
| Cu                           |           | <b>0.77</b>                         | 0.45          | -0.17            | -0.02         | -0.11         |
| Mn                           |           | <b>0.56</b>                         | -0.37         | 0.43             | 0.36          | 0.2           |
| <b>Factor</b>                | <b>df</b> | <b>Probability values</b>           |               |                  |               |               |
| Rotation                     | 3         | <i>0.0061</i>                       | <i>0.0175</i> | <i>0.0638</i>    | <i>0.0005</i> | <i>0.0574</i> |
| Tillage                      | 1         | <i>0.0012</i>                       | <i>0.0006</i> | <i>&lt;.0001</i> | <i>0.5677</i> | <i>0.0367</i> |
| Rotation x Tillage           | 3         | 0.8511                              | 0.8368        | 0.223            | 0.7103        | 0.6221        |

**Table S3.** List of bacterial principal components (PC) comprised by indicator species that contributed at least 5% of the variability in the data and with eigenvalue of at least 1.

| PC | Eigenvalue | Proportion (%) | Loadings | Phylum          | Class                         | Order                 | Family                               | Genus                                | Species                               |
|----|------------|----------------|----------|-----------------|-------------------------------|-----------------------|--------------------------------------|--------------------------------------|---------------------------------------|
| 1  | 12.76      | 36%            | -0.76    | Acidobacteria   | Acidobacteriia                | Acidobacteriales      | Acidobacteriaceae (Subgroup 1)       |                                      |                                       |
|    |            |                | -0.76    | Acidobacteria   | Acidobacteriia                | Solibacterales        | Solibacteraceae (Subgroup 3)         | <i>Candidatus</i>                    | <i>solibacter</i>                     |
|    |            |                | 0.63     | Acidobacteria   | Acidobacteriia Blastocatellia | Solibacterales        | Solibacteraceae (Subgroup 3)         | <i>Paludibaculum</i>                 | uncultured bacterium                  |
|    |            |                | 0.78     | Acidobacteria   | (Subgroup 4)                  | Pyrinomonadales       | Pyrinomonadaceae                     | <i>RB41</i>                          | uncultured bacterium 16H1             |
|    |            |                | 0.80     | Acidobacteria   | Holophagae                    | Subgroup 7            |                                      |                                      |                                       |
|    |            |                | 0.60     | Acidobacteria   | Subgroup 25                   | uncultured bacterium  | uncultured bacterium                 | uncultured bacterium                 | uncultured bacterium                  |
|    |            |                | 0.77     | Actinobacteria  | Acidimicrobiia                | Actinomarinales       | uncultured                           | uncultured soil bacterium            | uncultured soil bacterium             |
|    |            |                | -0.50    | Actinobacteria  | Actinobacteria                | Micrococcales         | Microbacteriaceae                    |                                      |                                       |
|    |            |                |          |                 |                               |                       | uncultured Actinomycetales bacterium | uncultured Actinomycetales bacterium | uncultured Actinomycetales bacterium  |
|    |            |                | 0.69     | Actinobacteria  | MB-A2-108                     | Actinomycetales       | uncultured actinobacterium           | uncultured actinobacterium           | uncultured actinobacterium            |
|    |            |                | 0.58     | Actinobacteria  | MB-A2-108                     | Actinobacterium       | uncultured bacterium                 | uncultured bacterium                 | uncultured bacterium                  |
|    |            |                | 0.57     | Chloroflexi     | Anaerolineae                  | RBG-13-54-9           | UASB_TL14                            | UASB_TL14                            | UASB_TL14                             |
|    |            |                | 0.75     | Chloroflexi     | Dehalococcoidia               | S085                  | uncultured bacterium                 | uncultured bacterium                 | uncultured bacterium                  |
|    |            |                | -0.83    | Chloroflexi     | Ktedonobacteria               | Ktedonobacteriales    | JG30-KF-AS9                          | uncultured bacterium                 | uncultured bacterium                  |
|    |            |                | 0.66     | Planctomycetes  | OM190                         | uncultured bacterium  | bacterium                            | uncultured bacterium                 | uncultured bacterium                  |
|    |            |                | -0.87    | Planctomycetes  | Phycisphaerae                 | Tepidisphaerales      | WD2101 soil group                    | Planctomycetales bacterium           | Planctomycetales bacterium            |
|    |            |                | 0.55     | Planctomycetes  | Phycisphaerae                 | mle1-8                | uncultured bacterium                 | uncultured bacterium                 | uncultured bacterium                  |
|    |            |                | -0.88    | Proteobacteria  | Alphaproteobacteria           | Micropepsales         | Micropepsaceae                       | uncultured                           |                                       |
|    |            |                | 0.80     | Proteobacteria  | Alphaproteobacteria           | Rhizobiales           | Rhizobiales Incertae Sedis           | <i>Nordella</i>                      |                                       |
|    |            |                | 0.67     | Proteobacteria  | Gammaproteobacteria           | Betaproteobacteriales | TRA3-20                              |                                      |                                       |
|    |            |                | -0.70    | Proteobacteria  | Gammaproteobacteria           | Xanthomonadales       | Rhodanobacteraceae                   | <i>Chujaibacter</i>                  |                                       |
|    |            |                | -0.57    | Proteobacteria  | Gammaproteobacteria           | Xanthomonadales       | Rhodanobacteraceae                   | <i>Rhodanobacter</i>                 |                                       |
| 2  | 3.12       | 9%             |          |                 |                               |                       | uncultured Firmicutes bacterium      | uncultured Firmicutes bacterium      | uncultured Firmicutes bacterium       |
|    |            |                | 0.54     | Rokubacteria    | NC10                          | Rokubacteriales       |                                      |                                      |                                       |
|    |            |                | -0.83    | Verrucomicrobia | Verrucomicrobiae              | Pedosphaerales        | Pedosphaeraaceae                     | Ellin516                             | Ellin516                              |
|    |            |                | -0.73    | Bacteroidetes   | Bacteroidia                   | Chitinophagales       |                                      |                                      |                                       |
|    |            |                | -0.60    | Proteobacteria  | Gammaproteobacteria           | Betaproteobacteriales | Nitrosomonadaceae                    | <i>MND1</i>                          | uncultured Nitrosomonadales bacterium |
|    |            |                | -0.64    | Actinobacteria  | Thermoleophilia               | Gaiellales            | Gaiellaceae                          | <i>Gaiella</i>                       |                                       |
|    |            |                | 0.60     | Bacteroidetes   | Bacteroidia                   | Sphingobacteriales    | AKYH767                              | metagenome                           | metagenome                            |
|    |            |                | 0.63     | Proteobacteria  | Gammaproteobacteria           | R7C24                 | metagenome                           | metagenome                           | metagenome                            |
|    |            |                | 0.49     | Proteobacteria  | Deltaproteobacteria           | Myxococcales          | Archangiaceae                        |                                      |                                       |
|    |            |                | -0.63    | Proteobacteria  | Gammaproteobacteria           | Xanthomonadales       | Xanthomonadaceae                     | <i>Luteimonas</i>                    |                                       |

**Table S4.** List of fungal principal components (PC) comprised by indicator species that contributed at least 5% of the variability in the data and with eigenvalue of at least 1.

| PC | Eigenvalue | Proportion (%) | Loadings | Phylum        | Class           | Order          | Family               | Genus                   | Species                 |
|----|------------|----------------|----------|---------------|-----------------|----------------|----------------------|-------------------------|-------------------------|
| 1  | 3.06       | 8%             | 0.55     | Ascomycota    | Sordariomycetes | Hypocreales    | Nectriaceae          | <i>Fusarium</i>         | <i>sporotrichioides</i> |
|    |            |                | 0.53     | Ascomycota    | Dothideomycetes | Capnodiales    | Mycosphaerellaceae   |                         |                         |
| 2  | 2.58       | 7%             | 0.58     | Ascomycota    | Sordariomycetes | Glomerellales  | Plectosphaerellaceae | <i>Gibellulopsis</i>    | <i>piscis</i>           |
|    |            |                | 0.71     | Ascomycota    | Sordariomycetes | Glomerellales  | Plectosphaerellaceae | <i>Plectosphaerella</i> |                         |
|    |            |                | 0.58     | Ascomycota    | Sordariomycetes | Coniochaetales | Coniochaetaceae      |                         |                         |
| 3  | 2.51       | 7%             | 0.73     | Ascomycota    | Sordariomycetes | Sordariales    | Lasiochaeraceae      | <i>Schizothecium</i>    |                         |
|    |            |                | 0.56     | Ascomycota    | Sordariomycetes | Sordariales    | Lasiochaeraceae      | <i>Schizothecium</i>    | <i>carpinicola</i>      |
| 4  | 2.12       | 6%             | 0.51     | Ascomycota    | Sordariomycetes | Hypocreales    | Bionectriaceae       | <i>Clonostachys</i>     | <i>rosea</i>            |
| 5  | 2.08       | 6%             | 0.49     | None selected |                 |                |                      |                         |                         |

**Table S5.** List of archaeal principal components (PC) comprised by indicator species that contributed at least 5% of the variability in the data and with eigenvalue of at least 1.

| PC | Eigenvalue | Proportion (%) | Loadings | Phylum          | Class           | Order             | Family              | Genus                      | Species                    |
|----|------------|----------------|----------|-----------------|-----------------|-------------------|---------------------|----------------------------|----------------------------|
| 1  | 2.24       | 20%            | 0.54     | Thaumarchaeota  | Nitrososphaeria | Nitrososphaerales | Nitrososphaeraceae  | <i>Candidatus</i>          | <i>nitrocosmicus</i>       |
|    |            |                |          |                 |                 |                   |                     | uncultured                 | uncultured                 |
|    |            |                | 0.50     | Thaumarchaeota  | Nitrososphaeria | Nitrososphaerales | Nitrososphaeraceae  | ammonia-oxidizing archaeon | ammonia-oxidizing archaeon |
|    |            |                | -0.56    | Thaumarchaeota  | Nitrososphaeria | Nitrososphaerales | Nitrososphaeraceae  | uncultured soil archaeon   | uncultured soil archaeon   |
|    |            |                | 0.60     | Thaumarchaeota  | Nitrososphaeria | Nitrososphaerales | Nitrososphaeraceae  |                            |                            |
| 2  | 1.69       | 15%            | -0.84    | Thaumarchaeota  | Nitrososphaeria | Nitrosotaleales   | Nitrosotaleaceae    | <i>Candidatus</i>          | <i>nitrosotalea</i>        |
|    |            |                |          |                 |                 |                   |                     | uncultured                 | uncultured                 |
|    |            |                | -0.29    | Thaumarchaeota  | Nitrososphaeria | Nitrososphaerales | Nitrososphaeraceae  | compost archaeon           | compost archaeon           |
| 3  | 1.27       | 12%            | -0.72    | Thaumarchaeota  | Nitrososphaeria | Nitrososphaerales | Nitrososphaeraceae  |                            |                            |
|    |            |                | 0.72     | Nanoarchaeaeota | Woeisearchaeia  |                   |                     |                            |                            |
| 4  | 1.26       | 11%            | 0.75     | Euryarchaeota   | Thermoplasmata  | Marine Group II   | uncultured archaeon | uncultured archaeon        | uncultured archaeon        |
| 5  | 1.08       | 10%            | 0.59     | Euryarchaeota   | Thermoplasmata  | uncultured        | uncultured archaeon | uncultured archaeon        | uncultured archaeon        |
|    |            |                | -0.57    | Thaumarchaeota  | Nitrososphaeria | Nitrososphaerales | Nitrososphaeraceae  | <i>Candidatus</i>          | <i>mitrososphaera</i>      |

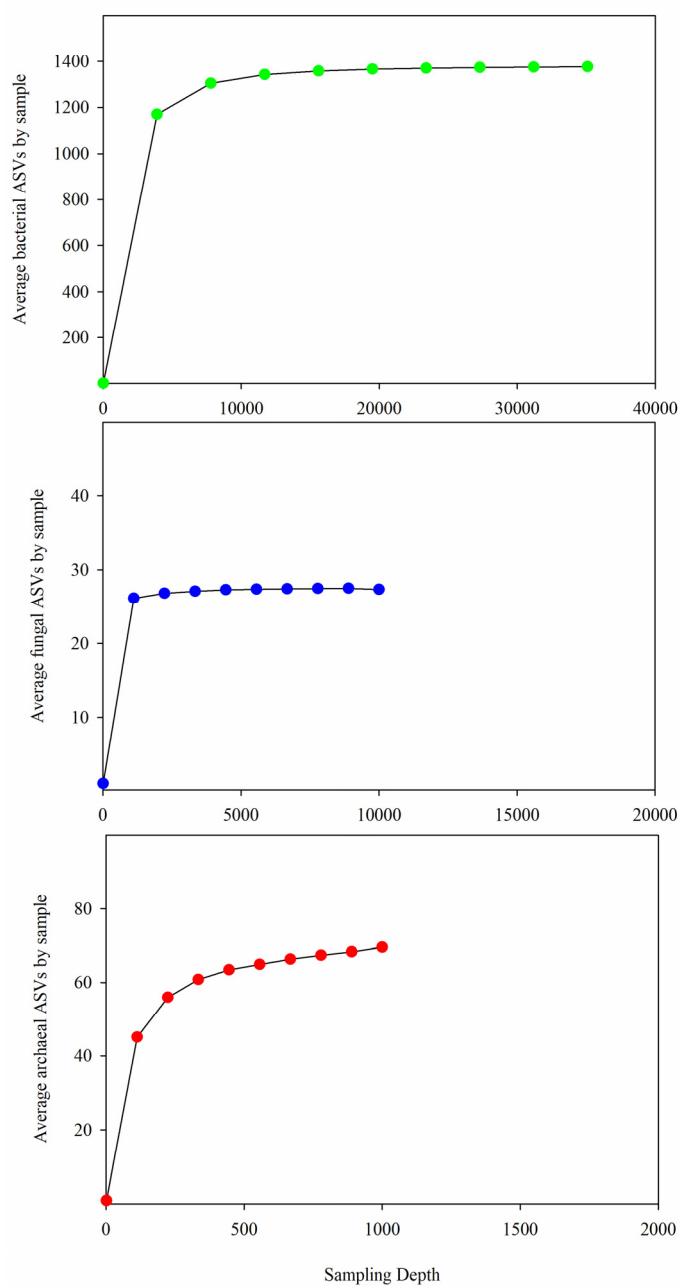

**Figure. S1.** Rarefaction curves for the major kingdoms of bacteria (green; top panel), fungi (blue; middle panel), and archaea (red; bottom panel). Points show the average number of observed ASVs for a given sampling depth (x-axis). For each taxa, rarefaction curves plateaued at sampling depths of 35,100, 10,000, and 1000 for bacterial, fungal, and archaeal sequences per sample, respectively.
